# Supplementary material for: Spark: A navigational paradigm for genomic data exploration
Source: HighWire-hosted journal article supplement (doi:10.1101/gr.140665.112), 2012-09-07
Supplement: SuppMaterial.pdf [file SuppMaterial.pdf]

## SUPPLEMENTAL MATERIAL

### 1. Spark resources

#### *Software*

The Spark Java application (currently v1.2.0) is available for download from:

<http://www.bcgsc.ca/downloads/spark/v1.2.0/>

Spark is also accessible via the Genboree Workbench. To access Spark, login into Genboree at [www.genboree.org](http://www.genboree.org), click on “Workbench” and from the “Epigenome” Menu, select “Cluster by Spark” under the “Analyze Signals” option.

#### *User Guide*

A detailed user guide is available within the Spark graphical user interface under the Help menu and is also available from:

<http://www.bcgsc.ca/downloads/spark/v1.2.0/supportingMaterial/manual.html>

#### *Tutorial Videos*

There are two tutorial videos available:

1. An overview of Spark’s core functionality:  
[http://www.bcgsc.ca/downloads/spark/v1.2.0/supportingMaterial/Spark\\_Tutorial.mp4](http://www.bcgsc.ca/downloads/spark/v1.2.0/supportingMaterial/Spark_Tutorial.mp4)
2. An overview of the interface to Spark within the Genboree Workbench:  
[http://www.bcgsc.ca/downloads/spark/v1.2.0/supportingMaterial/Genboree\\_Spark\\_Tutorial.mp4](http://www.bcgsc.ca/downloads/spark/v1.2.0/supportingMaterial/Genboree_Spark_Tutorial.mp4)

### 2. Clustering analyses for download

All clustering analyses used in this manuscript can be downloaded from:

[http://www.bcgsc.ca/downloads/spark/v1.2.0/supportingMaterial/H1\\_hESC\\_analysis.zip](http://www.bcgsc.ca/downloads/spark/v1.2.0/supportingMaterial/H1_hESC_analysis.zip)

The analyses are labeled as follows:

- |                        |                                                                                                                |
|------------------------|----------------------------------------------------------------------------------------------------------------|
| (a) TSSs_k2_split-Fig2 | Clustering across TSS using $k=2$ followed by manual cluster splits. Used for Figure 2 in the main manuscript. |
|------------------------|----------------------------------------------------------------------------------------------------------------|

- |                            |                                                                                                                      |
|----------------------------|----------------------------------------------------------------------------------------------------------------------|
| (b) TSSs_k3-FigS1          | Alternate clustering across TSSs using $k=3$ .<br>Used for Figure S1 (below).                                        |
| (c) YY1peaks_k2_split-Fig3 | Clustering across YY1 peaks using $k=2$ followed by manual cluster splits. Used for Figure 3 in the main manuscript. |

### 3. Choosing an initial $k$ value

We generated Figure 2 in the main manuscript by first clustering using  $k=2$  and subsequently interactively splitting cluster 1 (c1) into two sub-clusters (c1-1 and c1-2). Given that we expect three clusters in this data set (active, poised, and inactive), it is natural to instead use a single clustering step with  $k=3$ . In fact, such a clustering produces similar results (Supplemental Figure S1). However, it is worth pointing out that the separation between the groups from a biological standpoint is better with the two successive  $k=2$  cluster steps. This is qualitatively apparent from visual inspection of the cluster members in the region browser (cluster analyses can be downloaded from the link above).

One underlying assumption of  $k$ -means clustering is that the clusters have similar spatial extent. This is not the case in this example as the bivalent (poised) regions represent a much smaller group (roughly  $< 1\%$  of TSSs in our H1 analyses). As a result, the poised cluster produced in the  $k=3$  case is larger and less consistent than the one generated by successive clustering with  $k=2$ , where the transcriptionally active and poised groups are initially clustered together and are more easily separated in a subsequent step. This example demonstrates the value of allowing the user to guide the clustering, and in general, we recommend starting with a small initial  $k$  value and refining the clusters with interactive splits.

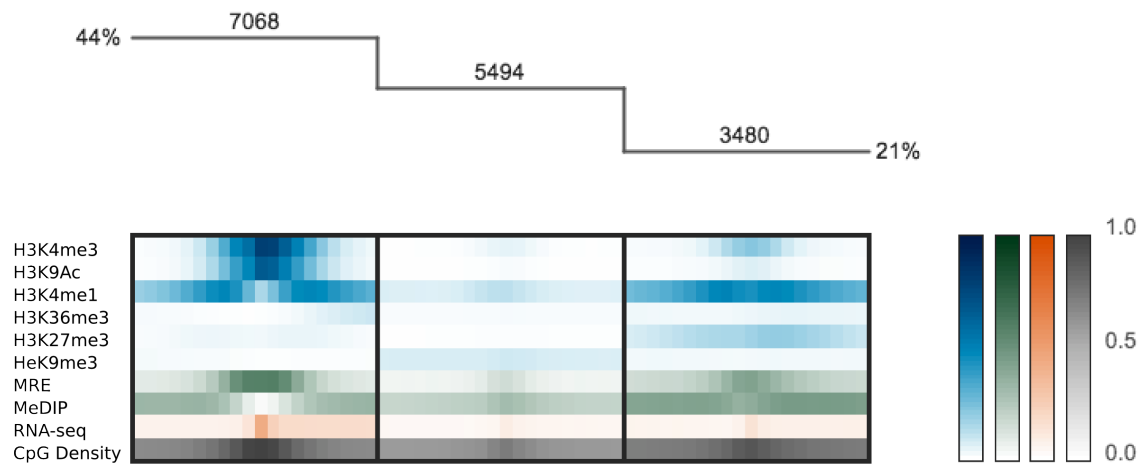

**Figure S1.** Clustering analysis centered on annotated TSSs using  $k=3$ . Figure features are as described for Figure 2 in the main text.
